# Supplementary material
Source: PubMed Central journal article supplement (PMC7753739)

Supplementary figure 1

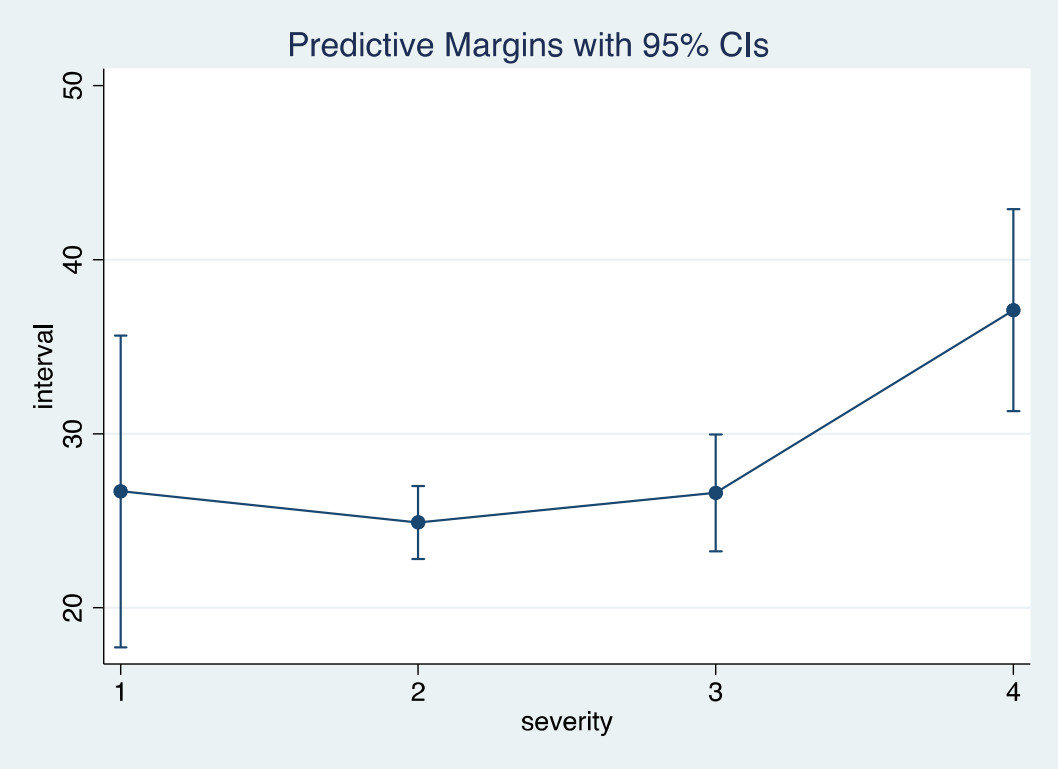

Supplement: TRF-61-830-s001.pdf [file TRF-61-830-s001.pdf]
